# Supplementary material for: Male sex identified by global COVID-19 meta-analysis as a risk factor for death and ITU admission
Source: PubMed Central journal article supplement (PMC7726563; doi:10.1038/s41467-020-19741-6), 2020-12-09
Supplement: 41467_2020_19741_MOESM4_ESM.pdf [file 41467_2020_19741_MOESM4_ESM.pdf]

## **Description of Additional Supplementary Files**

File Name:

20-09-23 Sex Bias in COVID-19 Supplementary Data.xlsx

Description:

Supplementary Data 1, spreadsheet of all data used for meta-analyses

Data are available at <http://doi.org/10.25375/uct.12952151>
